# Supplementary material for: Improved electrochemical performance of Li1.2Mn0.54Ni0.13Co0.13O2 by Mg doping for lithium ion battery cathode material
Source: Royal Society of Chemistry journal article supplement (doi:10.1039/c4ta01790k), 2014-01-01
Supplement: c4ta01790k1.pdf [file c4ta01790k1.pdf]

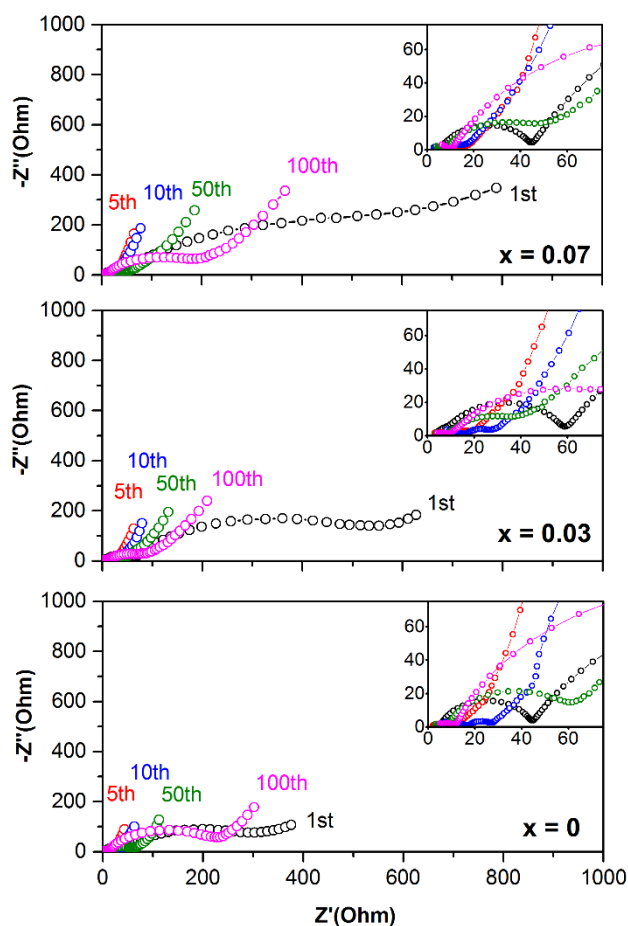

**Figure S1.** Nyquist plots of EIS results for  $\text{Li}_{1.2-x}\text{Mg}_x\text{Mn}_{0.54}\text{Ni}_{0.13}\text{Co}_{0.13}\text{O}_2$ . The high frequency part of each spectrum is magnified in the inset graph.
